# Supplementary material for: Nitroolefin-modified cyclometalated iridium(iii) complexes for tunable detection of biothiols with deep-red emission
Source: Royal Society of Chemistry journal article supplement (doi:10.1039/c8nj00314a), 2018-01-01
Supplement: c8nj00314a1.pdf [file c8nj00314a1.pdf]

## **Supporting Information**

**Nitrooelfin-modified Cyclometalated iridium(III) complexes for  
tunable detection of biothiols with deep-red emission**

**Table S1.** Comparison with recent Ir(III)-based probes for biothiols

| Entry | Reference                                        | Sensing phase                           | LOD                                       | Linear range                                                      | response time             |
|-------|--------------------------------------------------|-----------------------------------------|-------------------------------------------|-------------------------------------------------------------------|---------------------------|
| 1     | <b>This work</b>                                 | <b>DMSO/HEPES=1:1</b>                   | <b>Ir1: 47.6 nM</b><br><b>Ir2: 232 nM</b> | <b>10-80 <math>\mu</math>M</b><br><b>25-150 <math>\mu</math>M</b> | <b>80s</b><br><b>1min</b> |
| 2     | Rsc. Adv.,<br>2017,7(83):5262<br>1-52625         | DMSO/HEPES=4:1                          | 9.7 $\mu$ M                               | 50-450 $\mu$ M                                                    | —                         |
| 3     | J. Inorg.<br>Biochem. 2017,<br>177, 412-422      | KPI/MeOH=1:1                            | —                                         | —                                                                 | —                         |
| 4     | Sci. Technol.<br>Adv. Mat., 2016,<br>17, 109–114 | DMSO/HEPES=9:1                          | 1.67 $\mu$ M                              | 4-40 $\mu$ M                                                      | —                         |
| 5     | Chem.Comm.,<br>2016,52, 4450-<br>4453            | DMSO/HEPES=4:1                          | 0.78 $\mu$ M                              | 2.5 -80 $\mu$ M                                                   | 10 min                    |
| 6     | Opt. Express,<br>2016, 24,<br>28247–28255        | CH <sub>3</sub> CN/H <sub>2</sub> O=3:2 | —                                         | —                                                                 | —                         |

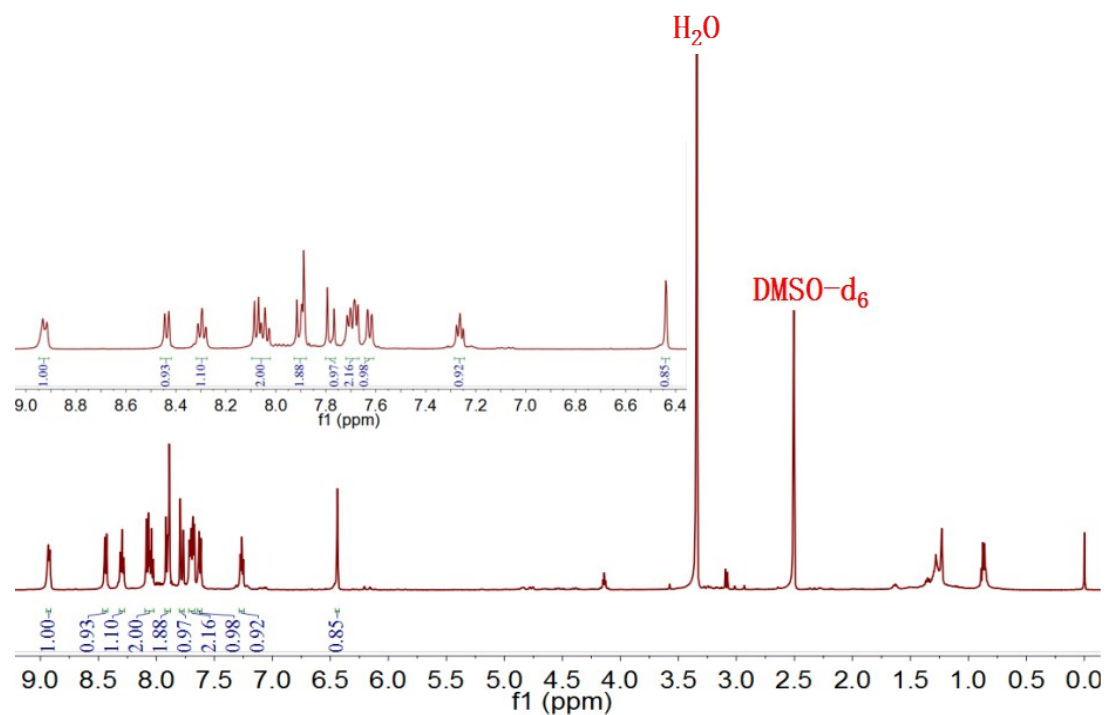

**Fig S1.**  $^1\text{H}$  NMR spectrum of **Ir1** in  $\text{DMSO}-d_6$ .

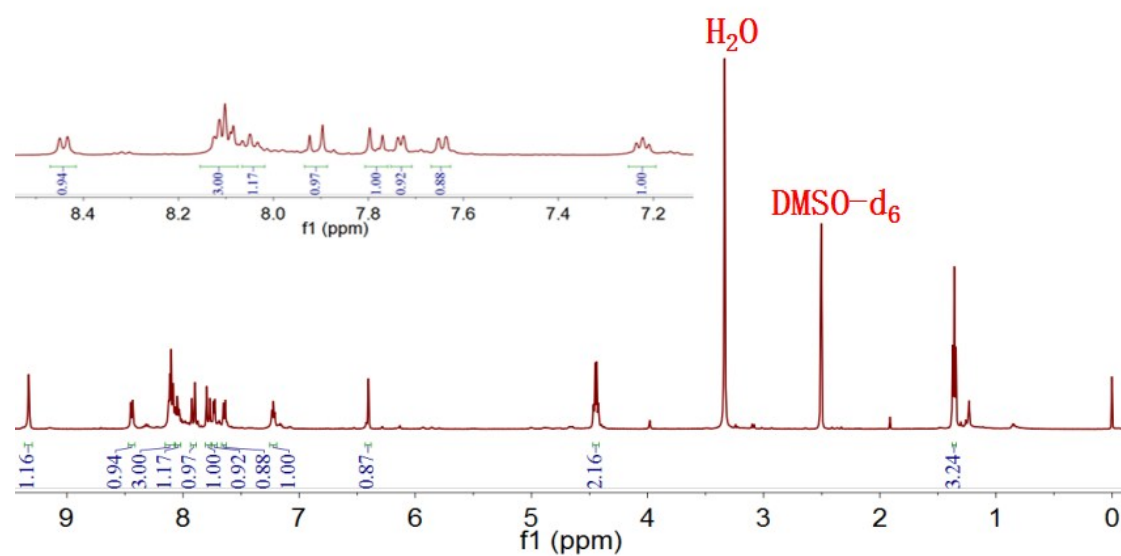

**Fig S2.**  $^1\text{H}$  NMR spectrum of **Ir2** in  $\text{DMSO}-d_6$ .

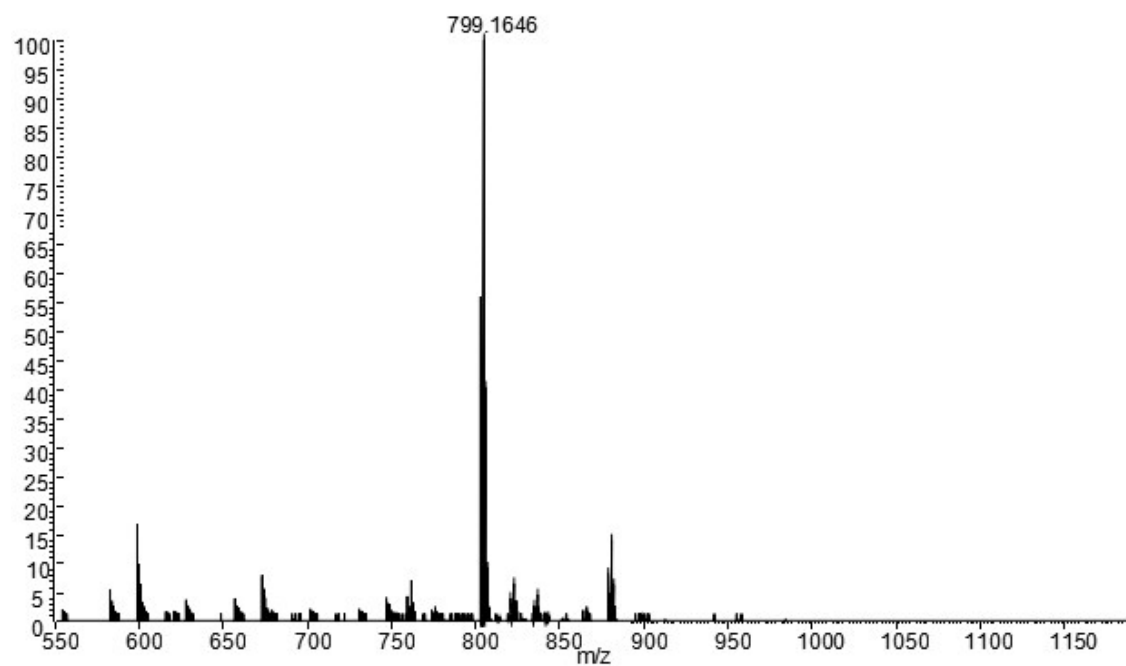

**Fig S3.** HRMS spectrum of **Ir1** in  $\text{CH}_3\text{CN}$ .

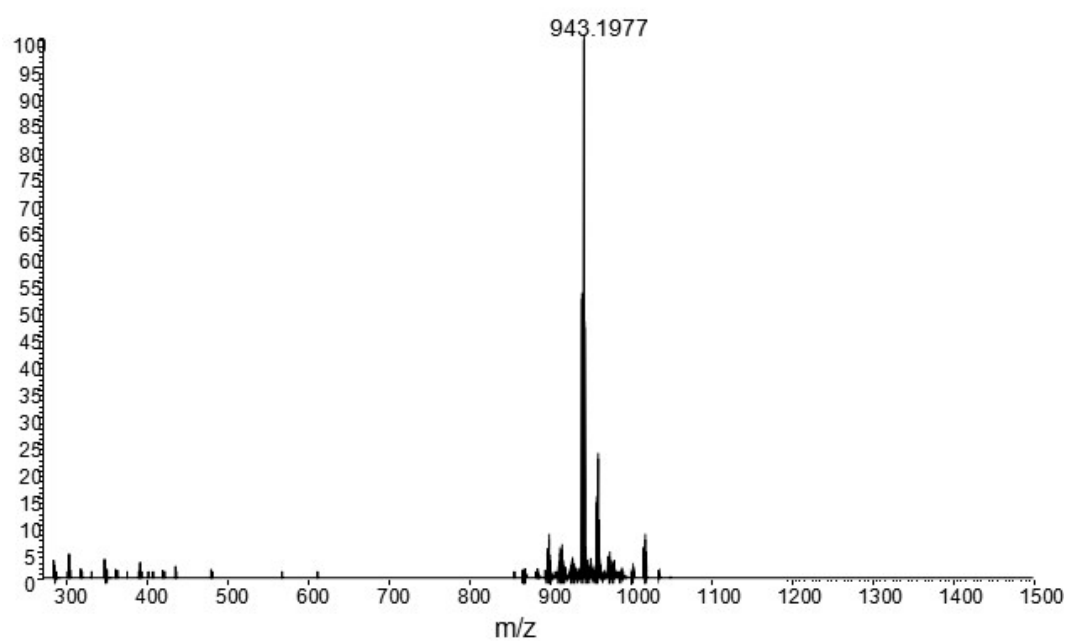

**Fig S4.** HRMS spectrum of **Ir2** in  $\text{CH}_3\text{CN}$ .

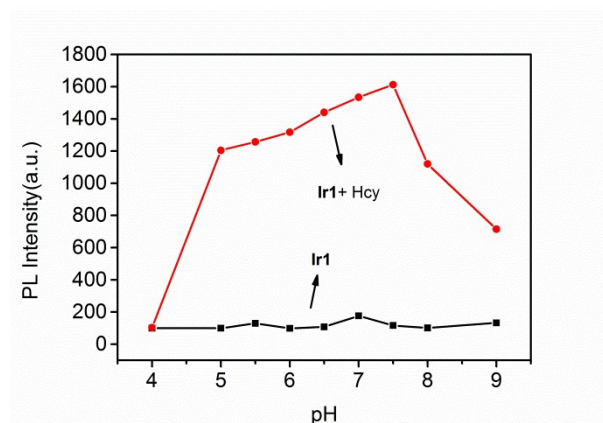

**Fig S5.** PL intensity of **Ir1** (10  $\mu\text{M}$ ) at 571nm in the presence and absence of Hcy under different pH.  $\lambda_{\text{ex}}$ =380 nm.

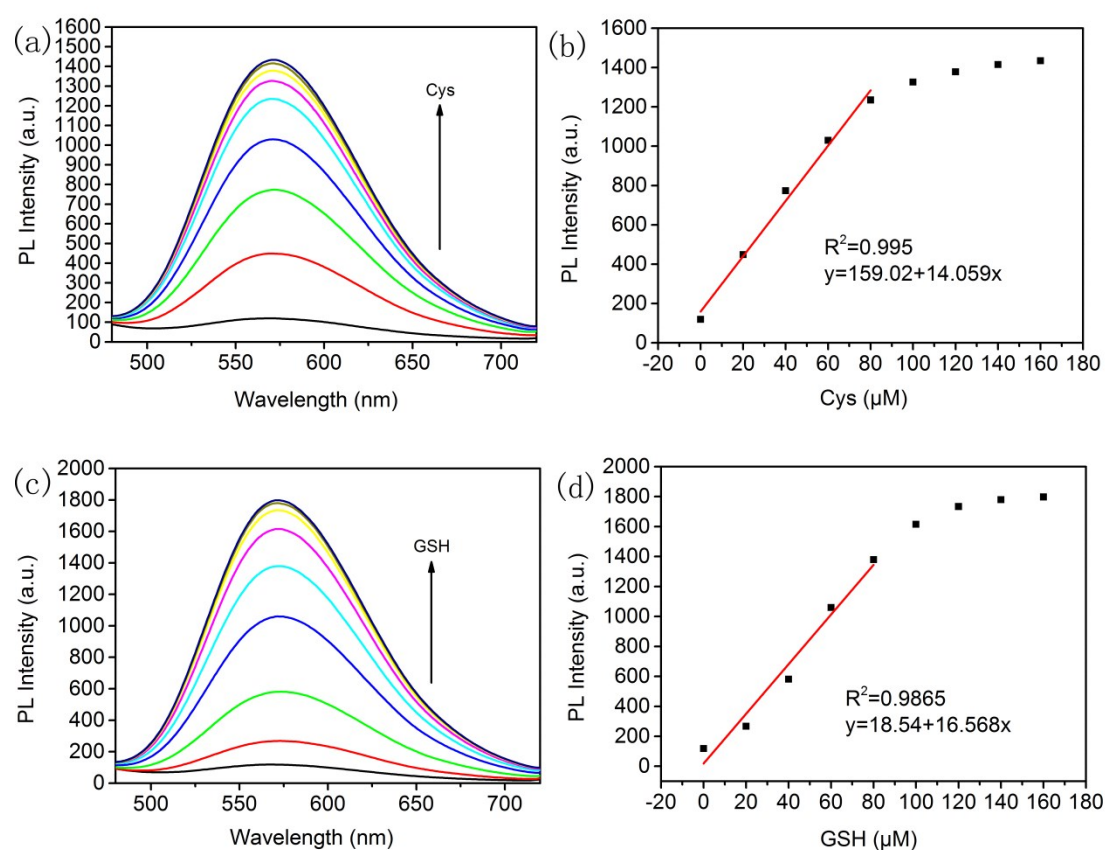

**Fig S6.** PL spectra of **Ir1** (10  $\mu\text{M}$ ) upon addition of Cys (a) and GSH (c) (0-160  $\mu\text{M}$ ) in DMSO/HEPES buffer solution (pH=7.4, 1:1, v/v); corresponding plot of PL intensity at 571 nm versus concentration of Cys (b) and GSH (d).  $\lambda_{\text{ex}}$ =380 nm.

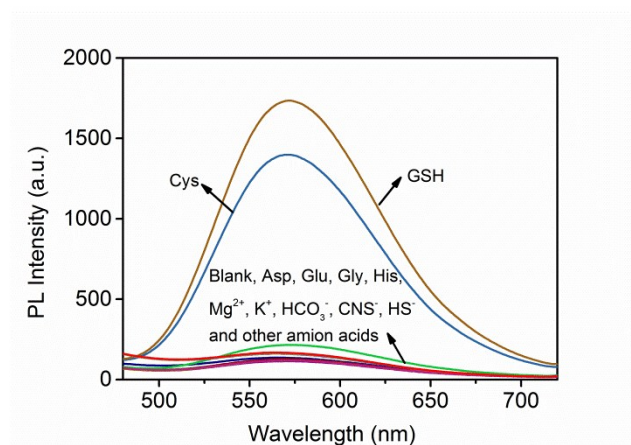

**Fig S7.** PL intensity of **Ir1** (10  $\mu$ M) with various analytes (1 mM) including Asp, Glu, Gly, His, Lys, Thr,  $\text{Mg}^{2+}$ ,  $\text{K}^+$ ,  $\text{HCO}_3^{2-}$ ,  $\text{CNS}^-$ ,  $\text{HS}^-$ , Ala, Arg, Phe, Pro, Ser, Trp, Tyr, GSSG, Cys and GSH in DMSO/HEPES buffer solution (pH=7.4, 1:1, v/v).

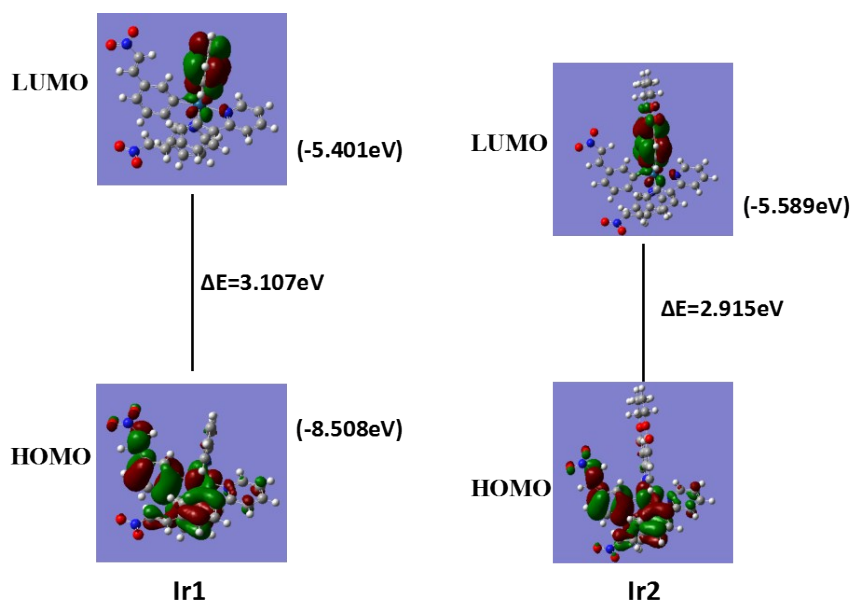

**Fig S8.** HOMO and LUMO Distributions of **Ir1** and **Ir2**.

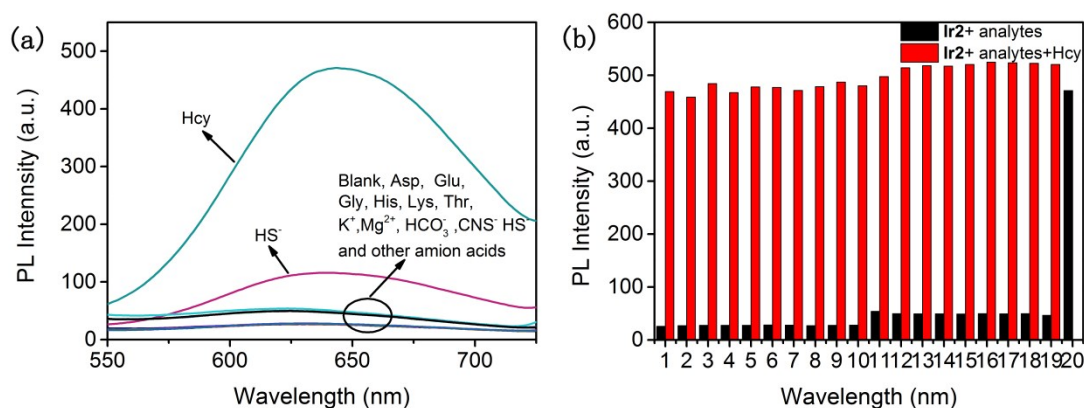

**Fig S9.** (a) PL intensity of **Ir2** (50 μM) in the presence of various analytes. (b) PL intensity of **Ir2** (50 μM) at 643 nm upon addition of Hcy and various analytes (1 mM) in DMSO/HEPES buffer solution (pH=7.4, 1:1, v/v) (1-Asp, 2-Glu, 3-Gly, 4-His, 5-Lys, 6-Thr, 7-Mg<sup>2+</sup>, 8-K<sup>+</sup>, 9-HCO<sub>3</sub><sup>2-</sup>, 10-CNS<sup>-</sup> and 11-HS<sup>-</sup>, 12-Ala, 13-Arg, 14-Phe, 15-Pro, 16-Ser, 17-Trp, 18-Tyr, 19-GSSG, 20-Hcy respectively, 300 μM.).  $\lambda_{\text{ex}}$ = 380 nm.

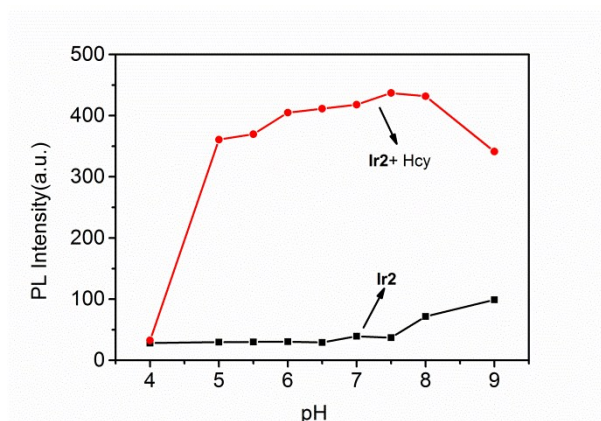

**Fig S10.** PL intensity of **Ir2** (50 μM) at 643 nm in the presence and absence of Hcy under different pH.  $\lambda_{\text{ex}}$ =380 nm.

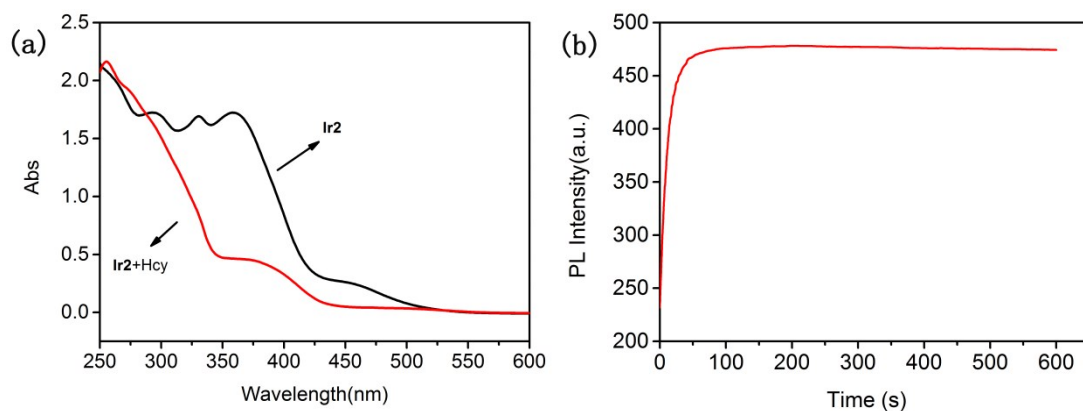

**Fig S11.** (a) Absorption spectra of **Ir2** (50 μM) in presence of Hcy in DMSO/HEPES buffer solution (pH=7.4, 1:1, v/v). (b) Time-dependent PL intensity of **Ir2** at 643 nm in presence of 6 equiv.  $\lambda_{\text{ex}}$ = 380 nm.

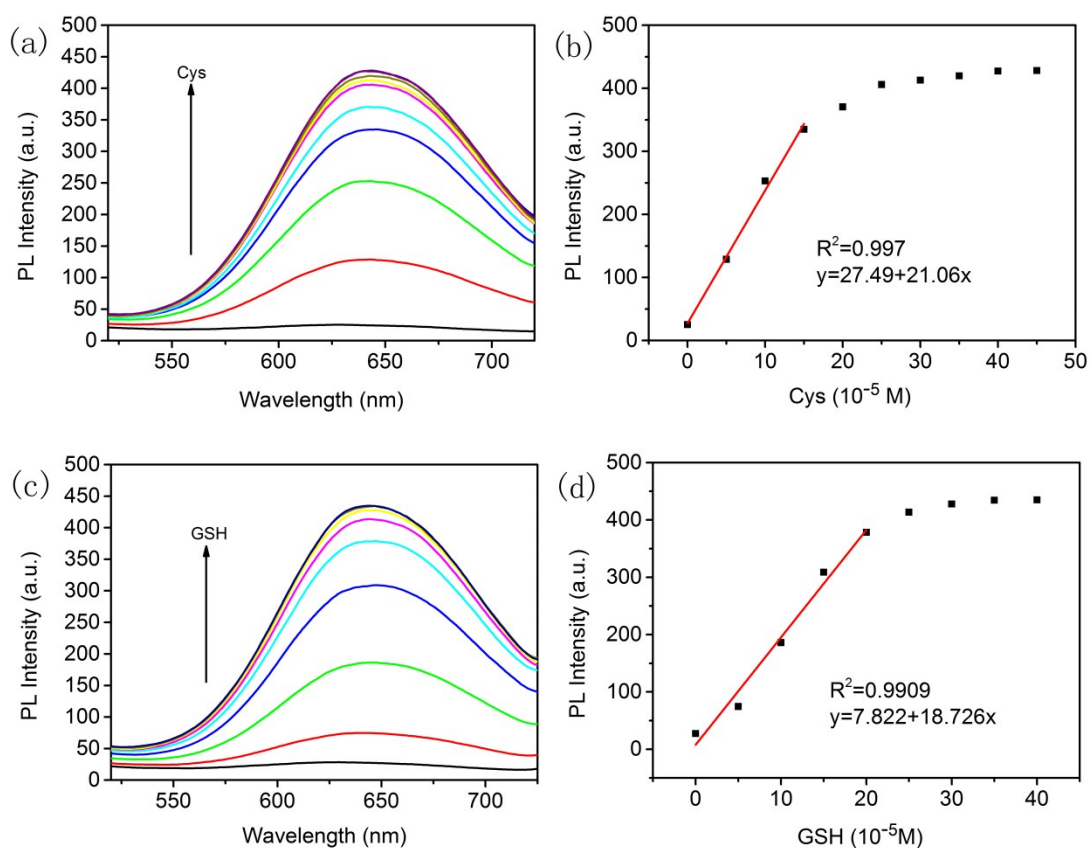

**Fig S12.** PL spectra of **Ir2** (50 μM) upon addition of Cys (a) (0-450 μM) and GSH (c) (0-400 μM) in DMSO/HEPES buffer solution (pH=7.4, 1:1, v/v); corresponding plot of PL intensity at 643 nm versus concentration of Cys (b) and GSH (d).  $\lambda_{\text{ex}}$ =380 nm.



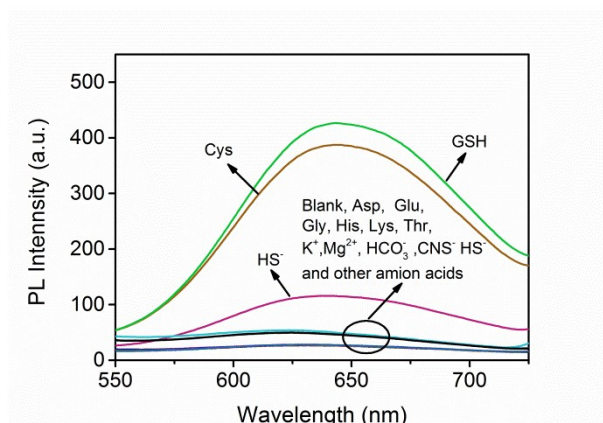

**Fig S13.** PL response of **Ir2** (50  $\mu$ M) with various analytes (1 mM) including Asp, Glu, Gly, His, Lys, Thr,  $\text{Mg}^{2+}$ ,  $\text{K}^+$ ,  $\text{HCO}_3^{2-}$ ,  $\text{CNS}^-$ ,  $\text{HS}^-$ , Ala, Arg, Phe, Pro, Ser, Trp, Tyr, GSSG, Cys and GSH in DMSO/HEPES buffer solution (pH=7.4, 10mM, 1:1, v/v).

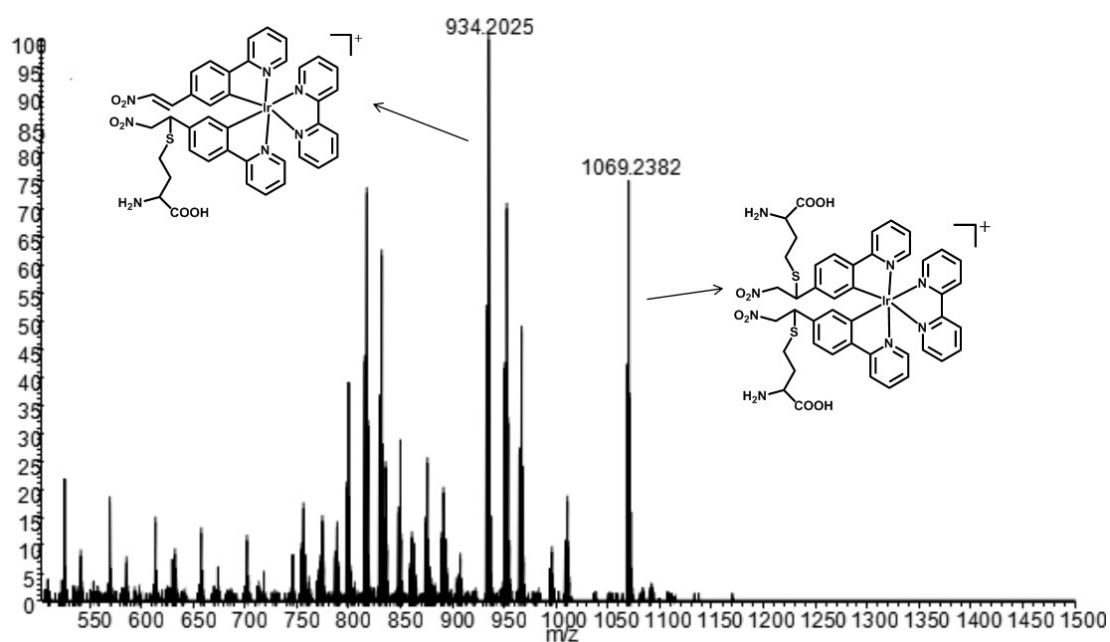

**Fig S14.** HRMS spectrum of **Ir1** (10  $\mu$ M) in the presence of Cys (5equiv.) for 3 min in the  $\text{CH}_3\text{CN}/\text{D}_2\text{O}$  solution (1:1, v/v).

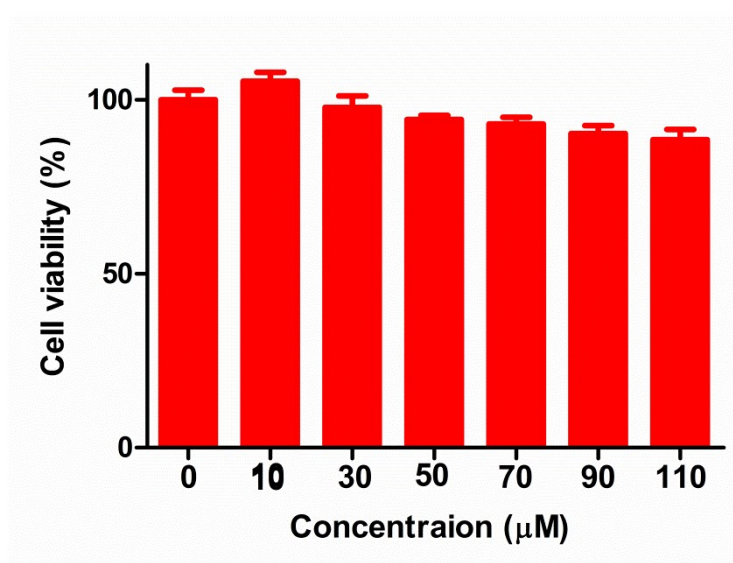

**Fig S15.** MTT result of **Ir2** with HeLa cells. The cytotoxicity of probes was assessed with a 3-(4,5-dimethyl-2-thiazolyl)-2,5-diphenyl-2-H-tetrazolium bromide (MTT) assays towards HeLa cells. The cells were seeded in 96-well plates at about 10000 cells per well in 100  $\mu$ L DMEM, and incubated at 37 oC in 5% CO<sub>2</sub> atmosphere for 24 h. After removing culture medium, **Ir2** diluted in DMSO (100  $\mu$ L) were added to cell wells with various concentrations of 0, 10, 30, 50, 70, 90 and 110  $\mu$ M. The cells were incubated for another 24 h. After the incubation, the culture medium was removed and DMEM (200  $\mu$ L) was added into cell wells. Then 20  $\mu$ L of 5 mg/mL MTT assays were added to cell wells and cells were incubated for another 4 h, followed by removal of the culture medium containing MTT and addition of 150  $\mu$ L of DMSO to each well to dissolve the formazan crystals formed. Finally, the plates were shaken for 5 min. The absorbance of the solution was measured on a Bio-Rad 680 microplate reader at 490 nm. Cell viability (%) was calculated based on the following equation:  $(A_{\text{sample}}/A_{\text{control}}) \times 100 \%$ , where  $A_{\text{sample}}$  and  $A_{\text{control}}$  denote as absorbencies of the sample well and control well, respectively.

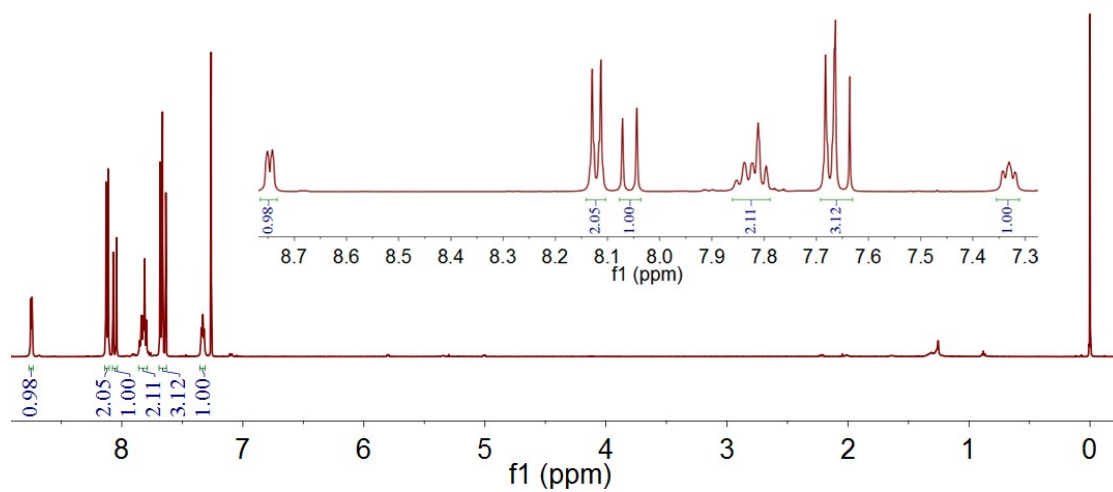

**Fig S16.** <sup>1</sup>H NMR spectrum of compound **1** in CDCl<sub>3</sub>.

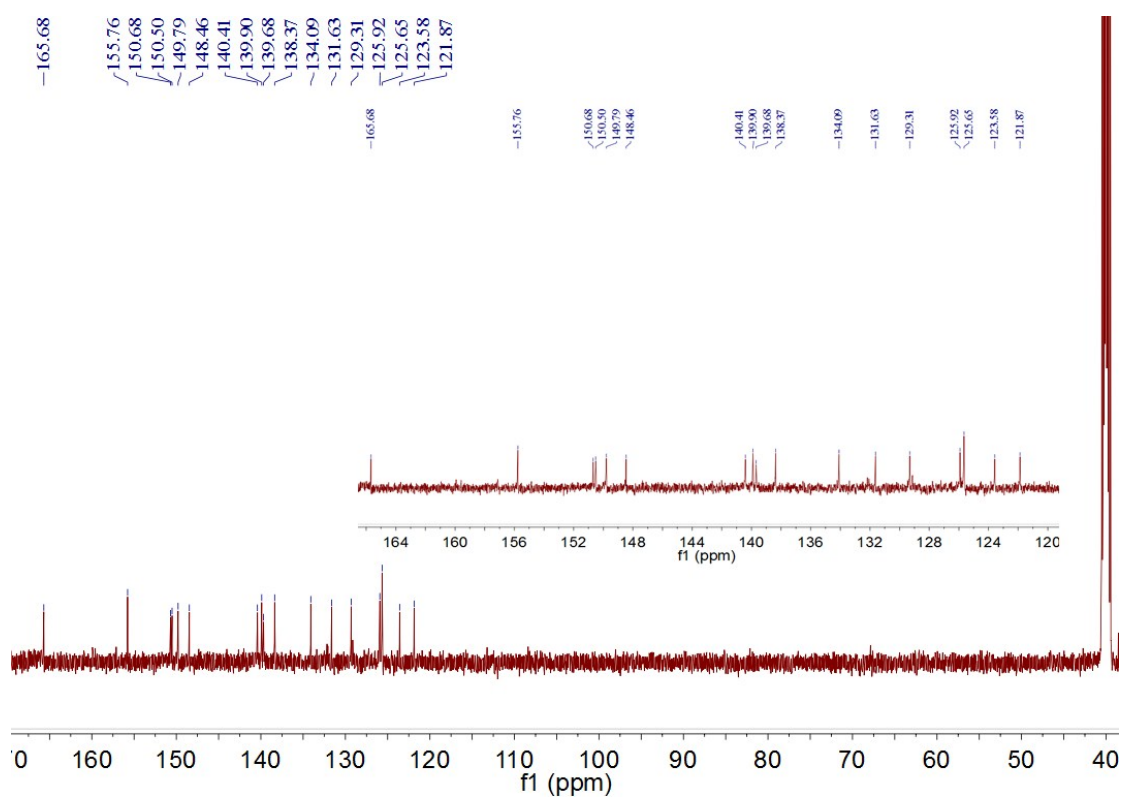

**Fig S17.** <sup>13</sup>C NMR spectrum of **Ir1** in DMSO.

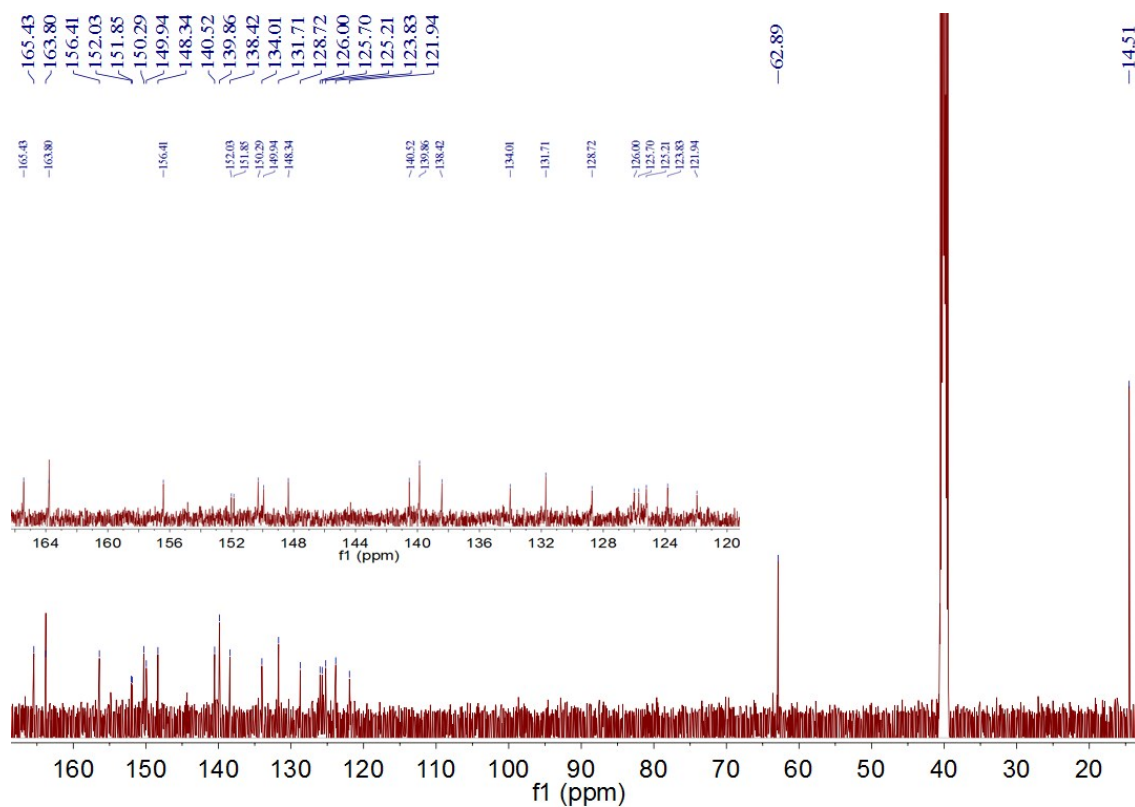

**Fig S18.** <sup>13</sup>C NMR spectrum of Ir2 in DMSO-d<sub>6</sub>.

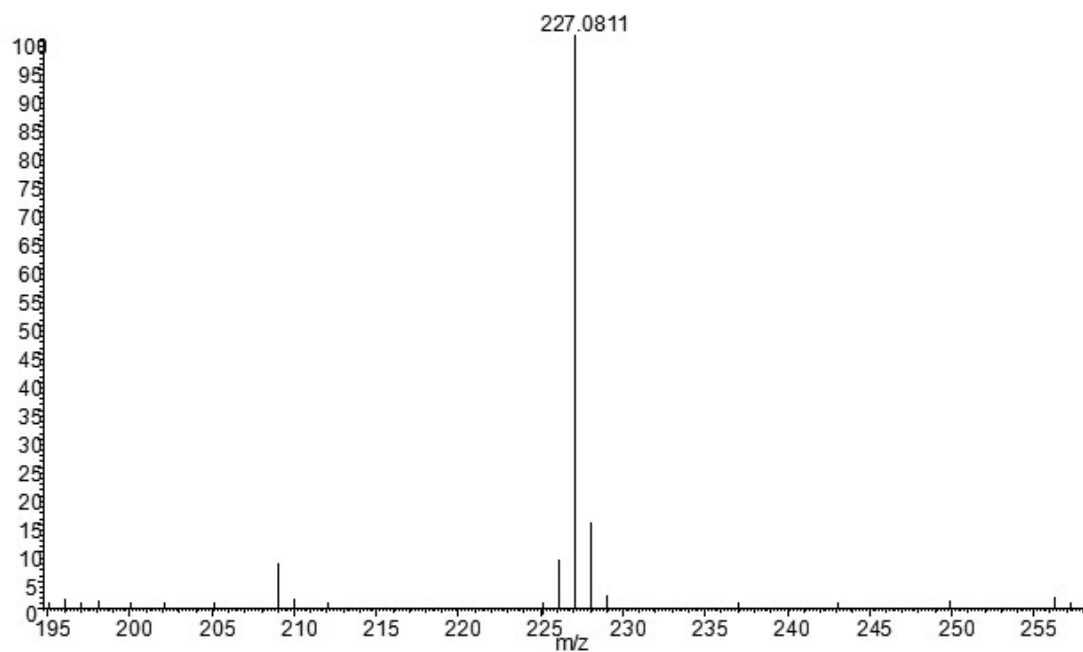

**Fig S19.** HRMS spectrum of compound 1 in CH<sub>3</sub>CN.
